# Supplementary material
Source: PubMed Central journal article supplement (PMC5558861)
Supplement: NIHMS886902-supplement.pdf [file NIHMS886902-supplement.pdf]

## INVENTORY OF SUPPLEMENTAL INFORMATION

### Loss of TMEM106B Ameliorates Lysosomal and Frontotemporal Dementia-Related Phenotypes in Progranulin-Deficient Mice

Zoe A. Klein, Hideyuki Takahashi, Mengxiao Ma, Massimiliano Stagi, Melissa Zhou, TuKiet T. Lam and Stephen M. Strittmatter

#### Supplemental figures

Figure S1. PGRN deficiency induces transcriptional up-regulation of TYROBP network genes (Related to Figure 1)

Figure S2. Autofluorescence in *Grn*<sup>-/-</sup> brain (Related to Figure 2)

Figure S3. Generation of *Tmem106b*<sup>-/-</sup> mice (Related to Figure 3)

Figure S4. TMEM106B deficiency does not revert transcriptional changes of lysosomal genes and complement C1q in *Grn*<sup>-/-</sup> mice (Related to Figure 5 and Figure 7)

Figure S5. PGRN deficiency has no significant effects on levels of V-ATPase V0 and V1 subunits (Related to Figure 5)

Figure S6. TMEM106B deficiency causes impairment in lysosomal acidification (Related to Figure 5).

Figure S7. Chronic Bafilomycin A1 treatment decreases lysosomal proteolysis in *Grn*<sup>-/-</sup> neurons (Related to Figure 5)

Figure S8. *Tmem106b* deletion does not revert lipofuscin and CD68-positive microglial accumulation in *Grn*<sup>-/-</sup> retina (Related to Figure 7).

#### Supplemental tables

Table S1. Lysosomal DE genes (WT vs. *Grn*<sup>-/-</sup>) identified by RNASeq (Related to Figure 1)

Table S2. Lysosomal DE genes (WT vs. *Grn*<sup>-/-</sup>) identified by LFQ-LCMS (Related to Figure 1)

Table S3. Transcriptional changes of typical microglial inflammatory genes and markers in *Grn*<sup>-/-</sup> by RNASeq (Related to Figure 1)

Table S4. DE genes (WT vs. *Tmem106b*<sup>-/-</sup>) identified by RNASeq (Related to Figure 3)

Table S5. Transcriptional changes of typical microglial inflammatory genes and markers and TNG in *Tmem106b*<sup>-/-</sup> by RNASeq (Related to Figure 3)

**A** STRING analysis using 347 up-regulated genes (logFC > 0.2, FDR < 0.05) in *Grn*<sup>-/-</sup> by RNASeq

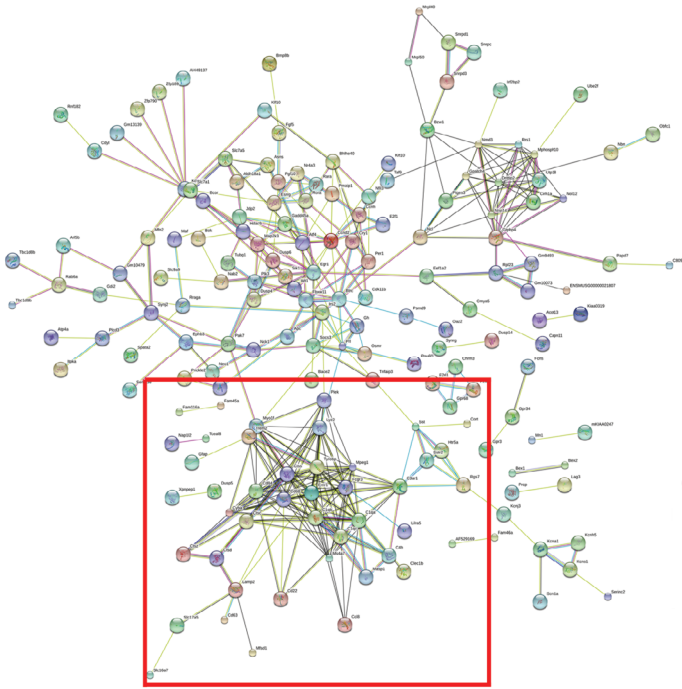

**B** TYROBP network genes (TNG)

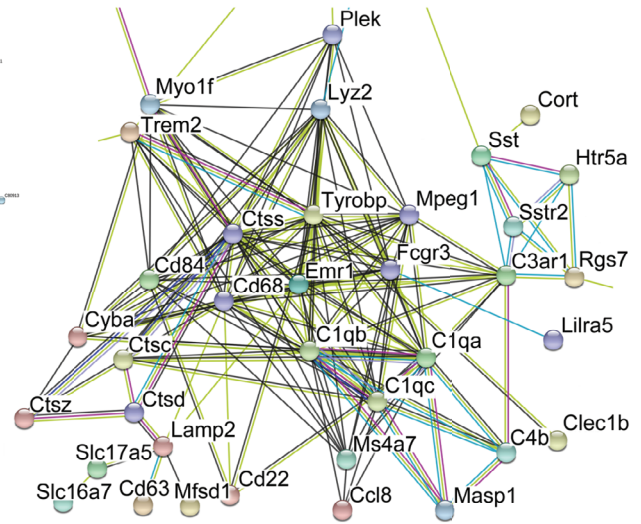

**Figure S1. PGRN deficiency induces transcriptional up-regulation of TYROBP network genes (Related to Figure 1)**

(A) Protein-protein interaction network by STRING analysis using 347 upregulated genes (logFC > 0.2, FDR < 0.05) in *Grn*<sup>-/-</sup> mice in RNASeq. A red square shows a gene cluster that consists of microglial genes.

(B) High magnification of a red square in (A) showing TYROBP network genes (TNG).

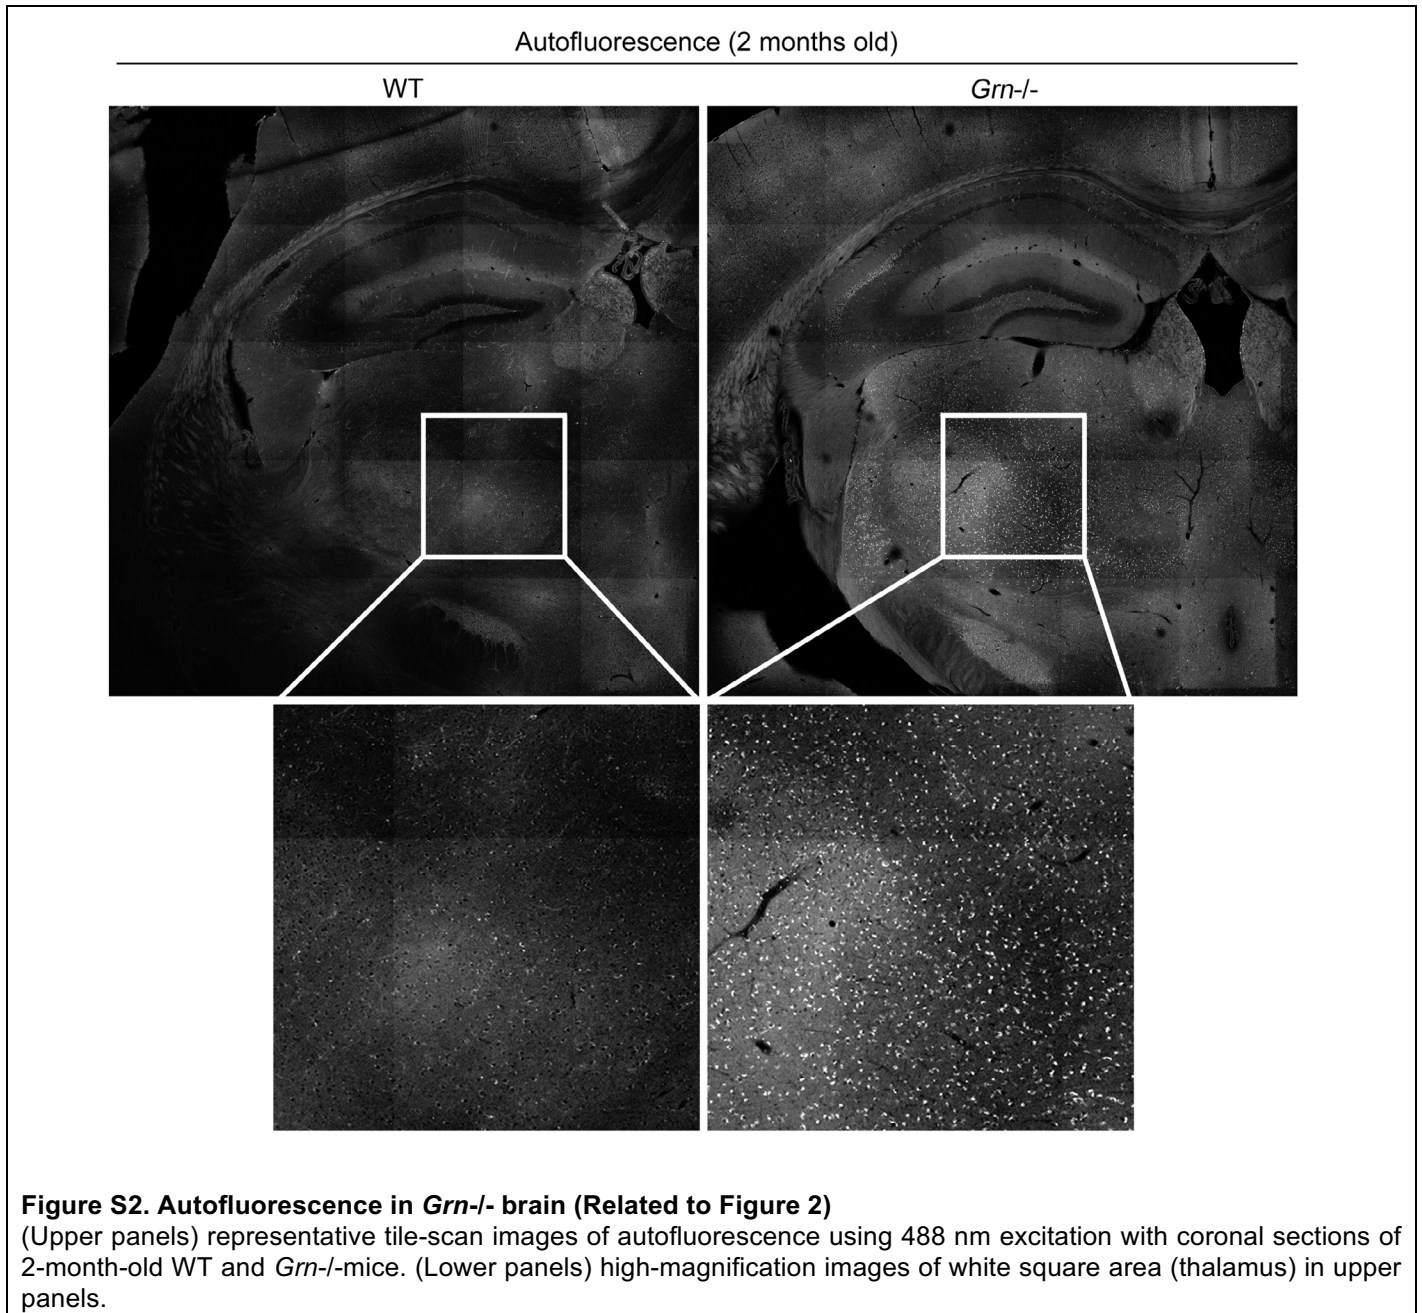

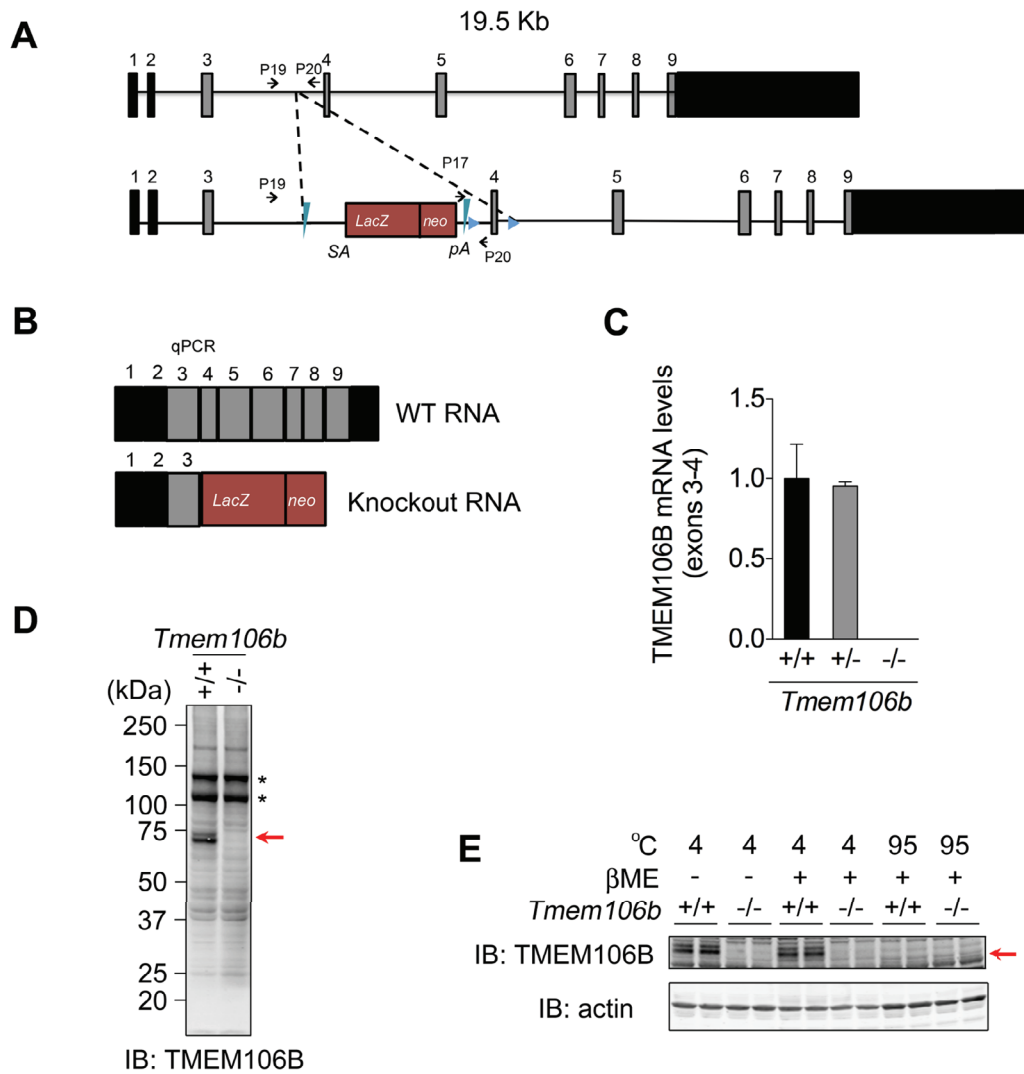

### Figure S3. Generation of *Tmem106b*<sup>-/-</sup> mice (Related to Figure 3)

- (A) Schematic drawing of the targeting strategy for the *Tmem106b* locus. Coding exons are represented in grey and non-coding exons are represented in black. LacZ and neomycin cassette is represented in red. P19 and P20 are the PCR primer pairs that amplify the WT allele and P19 and P17 are the primer pairs that amplify the knockout allele. Green triangles represent the FRT insertion. Blue arrowheads represent Lox-P sites.
- (B) RNA product from WT vs. Knockout.
- (C) Quantitative real-time PCR on total brain lysates of *Tmem106b*<sup>+/-</sup> and *Tmem106b*<sup>-/-</sup> mice with primers spanning the exon 3-4 junction showing total *Tmem106b* mRNA expression relative to WT. Mean ± sem.
- (D) Western blot analysis of WT and *Tmem106b*<sup>-/-</sup> brain lysates using anti-TMEM106B antibody. A red arrow shows bands that are knocked out in *Tmem106b*<sup>-/-</sup> brain. Asterisks show nonspecific bands.
- (E) Western blot analysis of WT and *Tmem106b*<sup>-/-</sup> brain lysates treated with 2× sample buffer with or without βME and with or without boiling for 5 min.



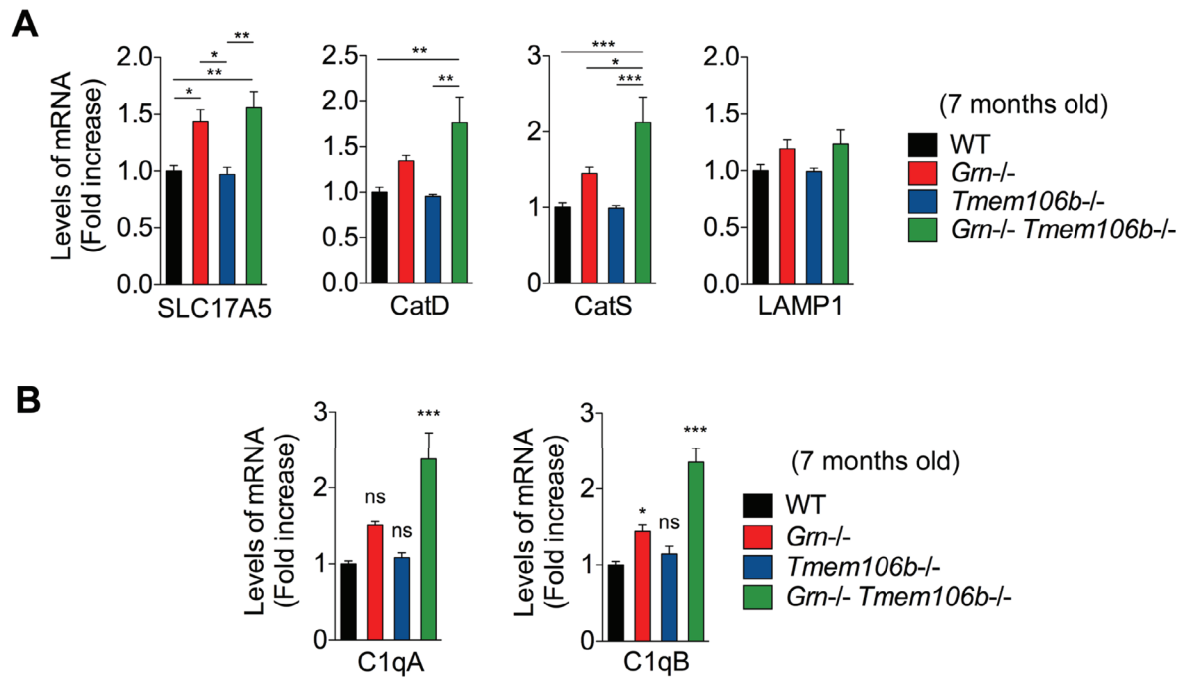

**Figure S4. TMEM106B deficiency does not revert transcriptional changes of lysosomal genes and complement C1q in *Grn*<sup>-/-</sup> mice (Related to Figure 5 and Figure 7)**

- (A) Quantitative real-time PCR analysis of transcription of SLC17A5, CatD, CatS, and LAMP1 in 7-month-old WT, *Grn*<sup>-/-</sup>, *Tmem106b*<sup>-/-</sup>, and *Grn*<sup>-/-</sup> *Tmem106b*<sup>-/-</sup> mice. Mean  $\pm$  sem, n = 3-4/genotype. \*p < 0.05, \*\*p < 0.01, \*\*\*p < 0.001; One-way ANOVA with Tukey's multiple comparisons *post hoc* test.
- (B) Quantitative real-time PCR analysis of transcription of C1qA and C1qB in 7-month-old WT, *Grn*<sup>-/-</sup>, *Tmem106b*<sup>-/-</sup>, and *Grn*<sup>-/-</sup> *Tmem106b*<sup>-/-</sup> mice. Mean  $\pm$  sem, n = 3-4/genotype. \*p < 0.05, \*\*\*p < 0.001; One-way ANOVA with Dunnett's *post hoc* test.

A

| Gene ID            | Gene name | FC          | LogCPM      | LR          | PValue      | FDR         |
|--------------------|-----------|-------------|-------------|-------------|-------------|-------------|
| ENSMUSG00000019302 | Atp6v0a1  | 1.009966282 | 8.910329551 | 0.095096815 | 0.757794937 | 0.928086097 |
| ENSMUSG00000024121 | Atp6v0c   | 1.023190038 | 8.830102874 | 0.421199177 | 0.516339284 | 0.817472158 |
| ENSMUSG00000013160 | Atp6v0d1  | 1.065034459 | 7.812810601 | 5.64328608  | 0.017522336 | 0.169477331 |
| ENSMUSG00000019087 | Atp6ap1   | 1.045697869 | 8.273236365 | 2.024879549 | 0.154741192 | 0.509942566 |

B

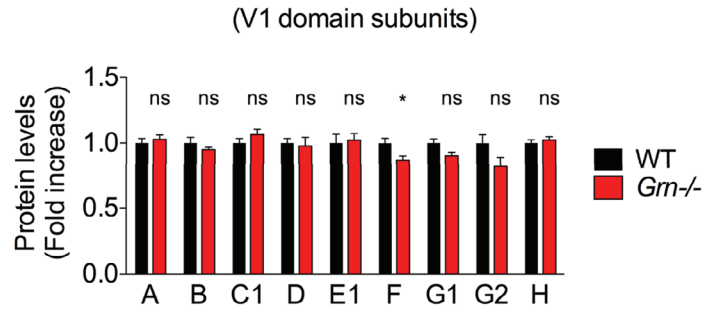

**Figure S5. PGRN deficiency has no significant effects on levels of V-ATPase V0 and V1 subunits (Related to Figure 5)**

(A) Transcriptional changes in V-ATPase V0 subunits in *Grn*<sup>-/-</sup> brain by RNASeq.

(B) Protein levels of V-ATPase V1 subunits in *Grn*<sup>-/-</sup> brain detected by LFQ-LCMS analysis. Mean  $\pm$  sem, n= 6 (WT), 4 (KO), \*p < 0.05.

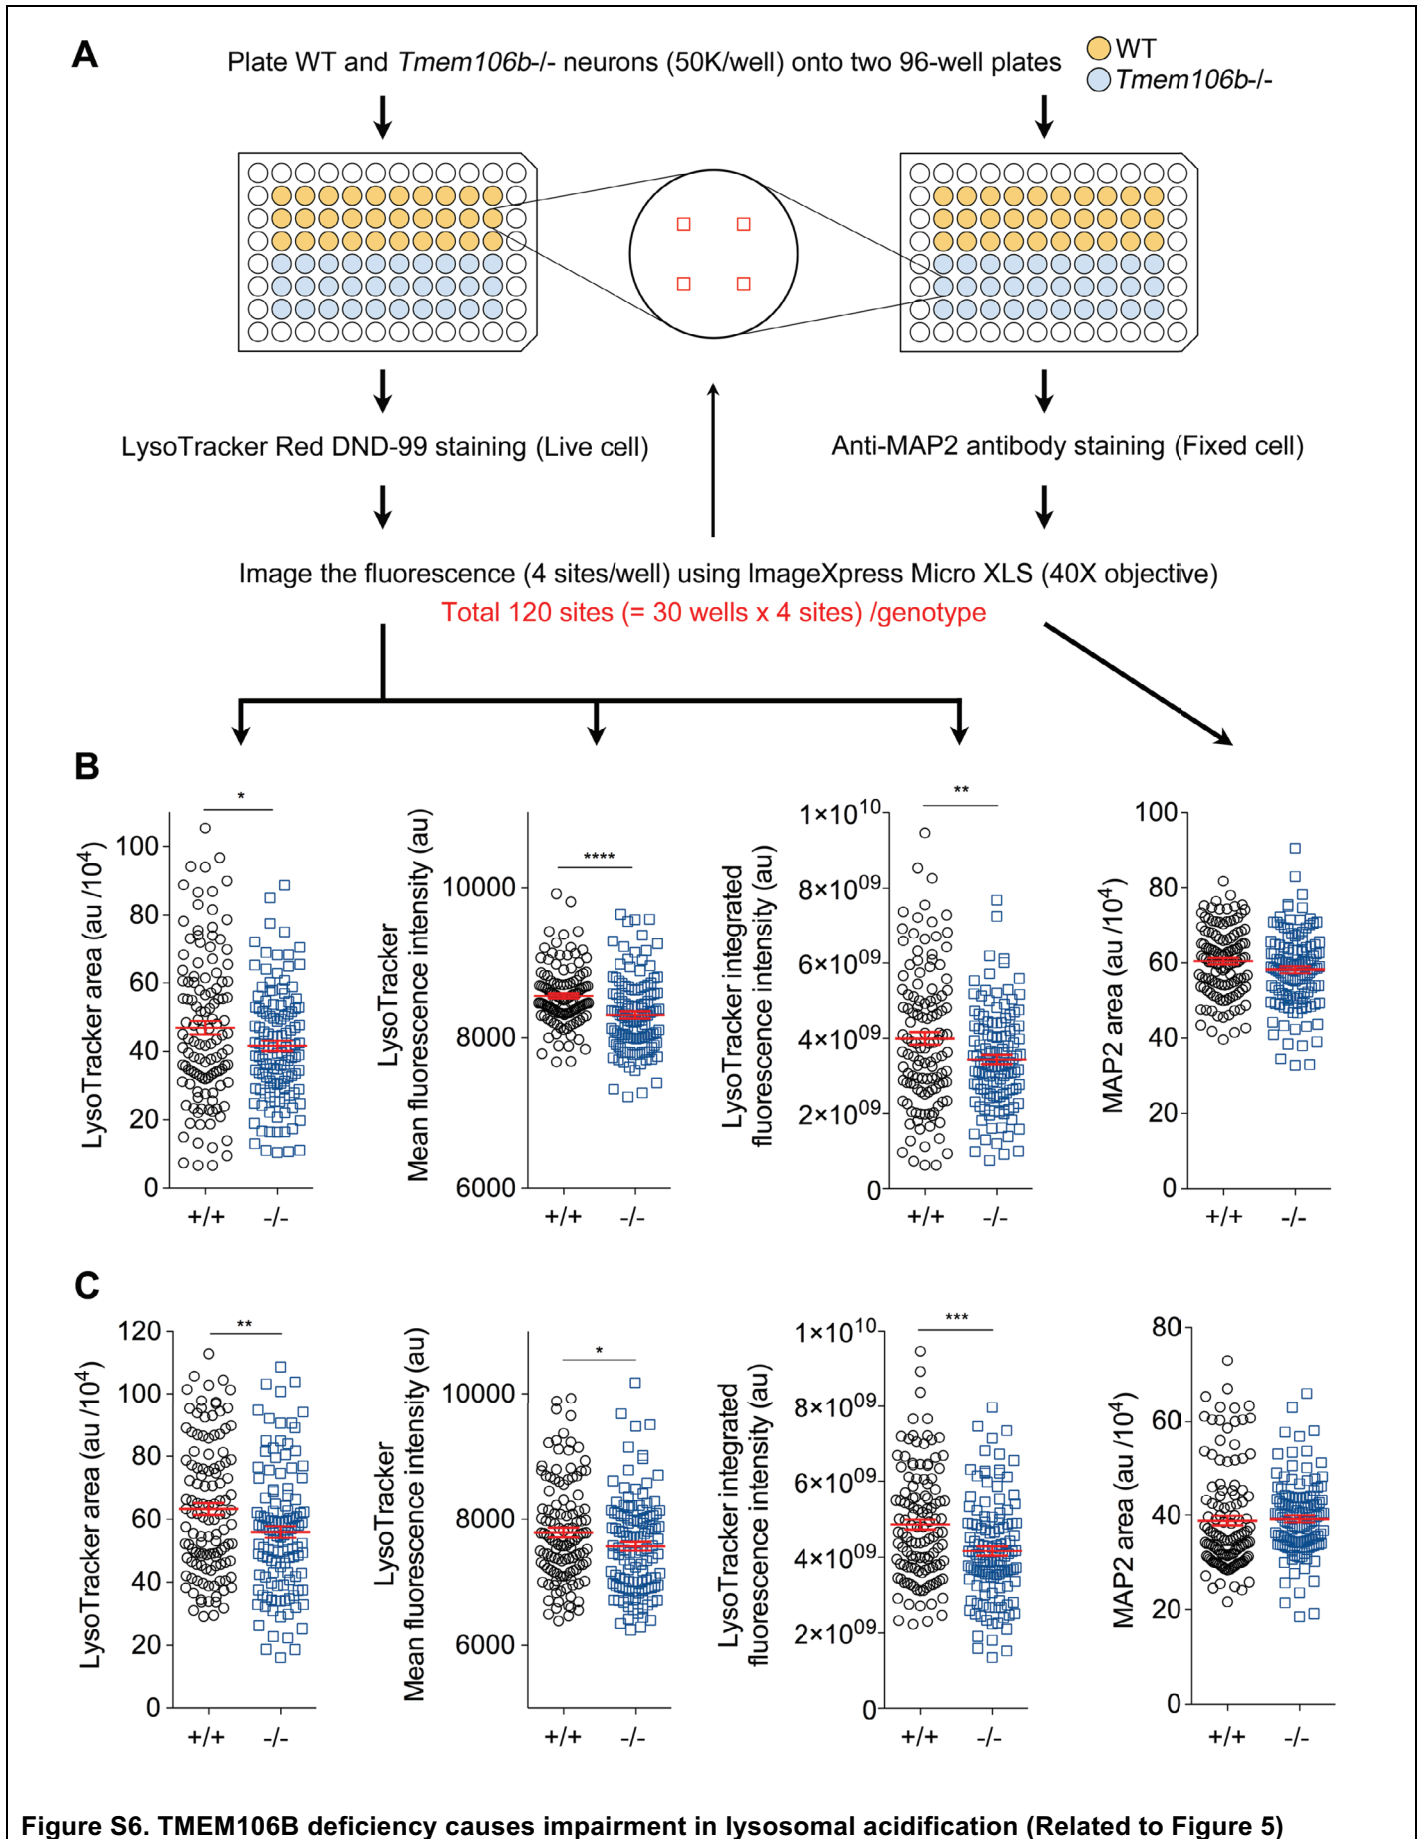

- (A) Diagram showing the experimental procedures of LysoTracker Red DND-99 and anti-MAP2 staining using WT and *Tmem106b*<sup>-/-</sup> primary cultured neurons.
- (B) A result from an independent experiment showing LysoTracker-positive area, LysoTracker mean fluorescence intensity, LysoTracker integrated fluorescence intensity, and MAP2-positive area in WT and *Tmem106b*<sup>-/-</sup> primary cultured neurons. Mean  $\pm$  sem, \* $p < 0.05$ , \*\* $p < 0.01$ , \*\*\*\* $p < 0.0001$ ; Unpaired T-test.
- (C) A result from another independent experiment showing LysoTracker-positive area, LysoTracker mean fluorescence intensity, LysoTracker integrated fluorescence intensity, and MAP2-positive area in WT and *Tmem106b*<sup>-/-</sup> primary cultured neurons. Mean  $\pm$  sem, \* $p < 0.05$ , \*\* $p < 0.01$ , \*\*\* $p < 0.001$ ; Unpaired T-test.

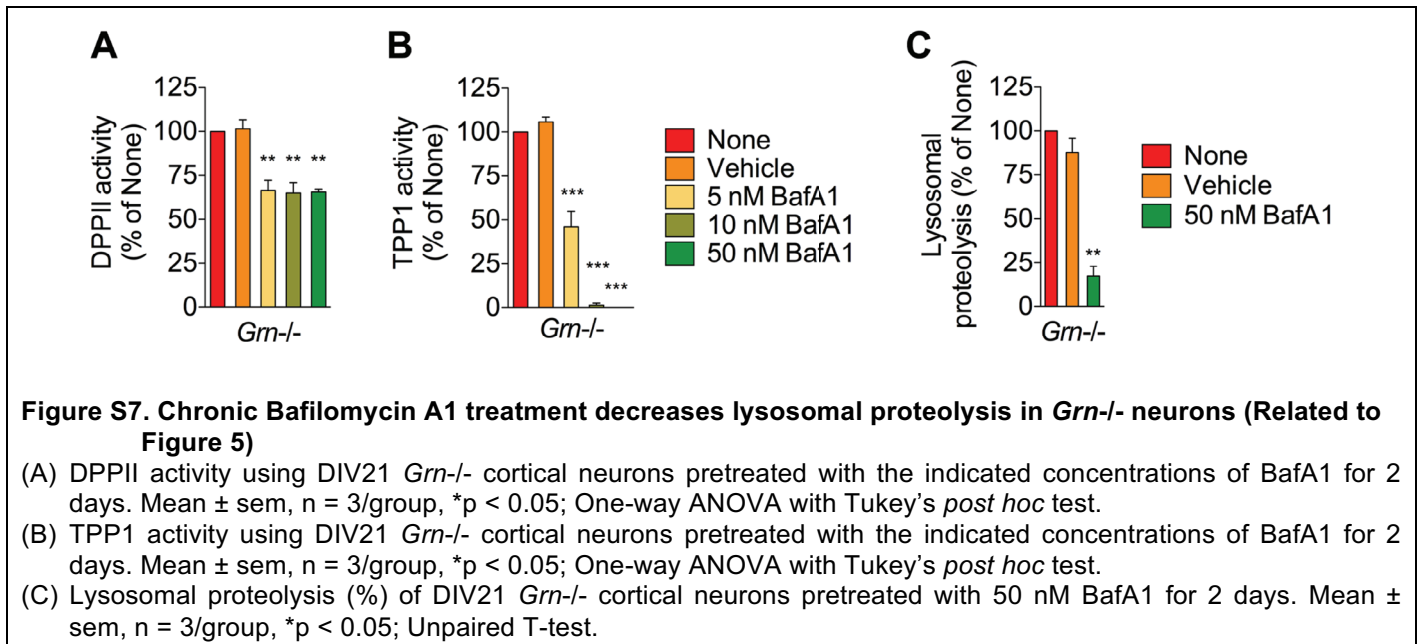

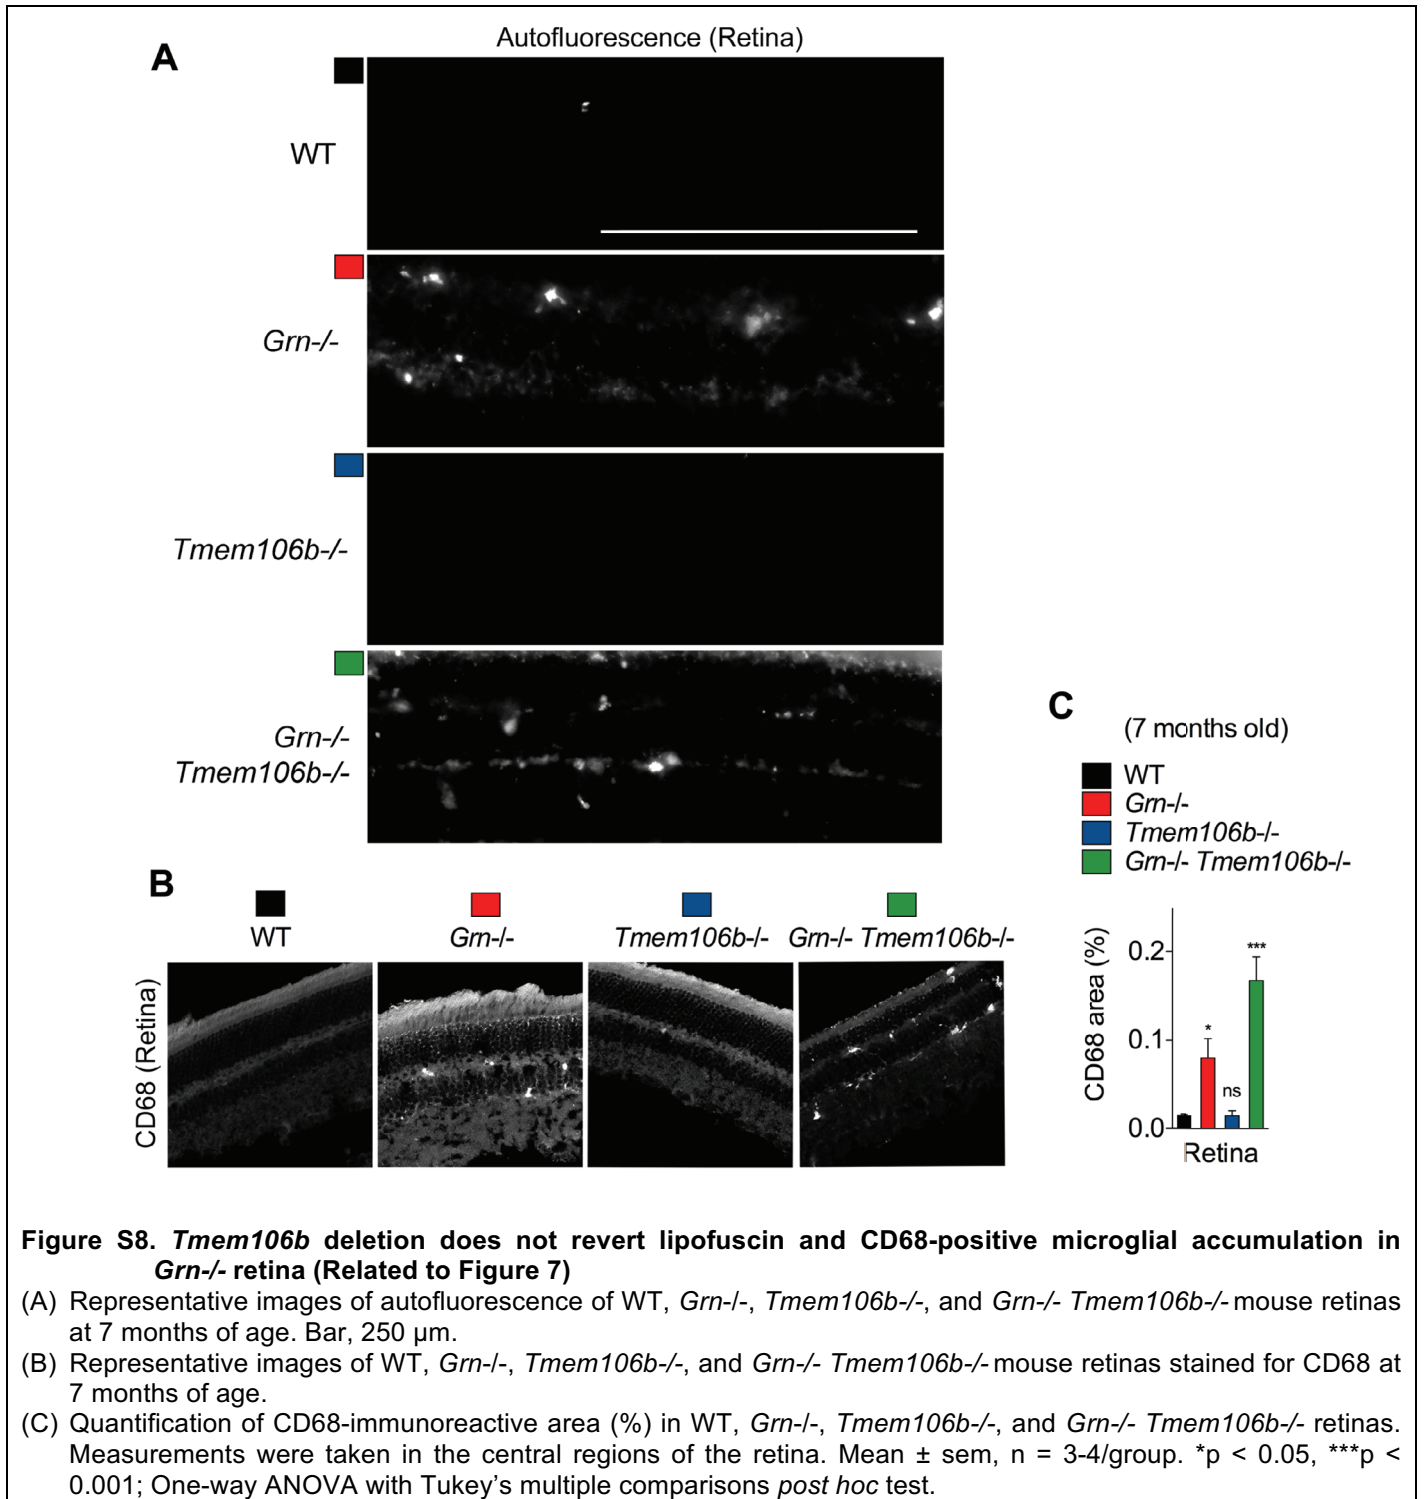

**Table S1. Lysosomal DE genes (WT vs. *Grn*<sup>-/-</sup>) identified by RNASeq (Related to Figure 1)**

| Gene ID             | Gene name | FC (KO/WT)  | LogCPM      | LR          | PValue      | FDR         |
|---------------------|-----------|-------------|-------------|-------------|-------------|-------------|
| ENSMUSG00000007891  | Ctsd      | 1.229009835 | 8.357909378 | 43.99259471 | 3.30E-11    | 8.53E-09    |
| ENSMUSG00000003948  | Mmd       | 1.195215619 | 8.221937819 | 43.4093542  | 4.44E-11    | 1.12E-08    |
| ENSMUSG00000018774  | Cd68      | 1.513754854 | 3.146479311 | 38.81841472 | 4.65E-10    | 9.78E-08    |
| ENSMUSG00000038642  | Ctss      | 1.26217449  | 5.806007008 | 35.52816403 | 2.51E-09    | 4.72E-07    |
| ENSMUSG00000070934  | Rraga     | 1.149545311 | 6.735359396 | 23.41010913 | 1.31E-06    | 0.000132551 |
| ENSMUSG00000049624  | Slc17a5   | 1.279810468 | 4.548337259 | 23.23106104 | 1.44E-06    | 0.000143209 |
| ENSMUSG00000031447  | Lamp1     | 1.119088723 | 8.249854963 | 22.08191094 | 2.61E-06    | 0.000243928 |
| ENSMUSG00000021939  | Ctsb      | 1.132302328 | 9.010809054 | 18.61453816 | 1.60E-05    | 0.001070741 |
| ENSMUSG00000005142  | Man2b1    | 1.173484496 | 5.397363067 | 18.19128763 | 2.00E-05    | 0.001263745 |
| ENSMUSG00000021680  | Crhbp     | 1.258045378 | 4.281552584 | 16.33276309 | 5.31E-05    | 0.002825131 |
| ENSMUSG00000016256  | Ctsz      | 1.207275796 | 4.89159043  | 15.83033036 | 6.93E-05    | 0.003385808 |
| ENSMUSG00000016534  | Lamp2     | 1.16764638  | 6.462705847 | 15.11460237 | 0.000101178 | 0.004613568 |
| ENSMUSG000000021242 | Npc2      | 1.140552318 | 5.629407519 | 14.02434175 | 0.000180459 | 0.007173942 |
| ENSMUSG00000030560  | Ctsc      | 1.246713745 | 3.511111916 | 13.87187737 | 0.000195705 | 0.007707398 |
| ENSMUSG00000025351  | Cd63      | 1.151256771 | 5.292495419 | 13.55074873 | 0.000232199 | 0.008714283 |
| ENSMUSG00000029434  | Vps33a    | 1.113674372 | 6.740525479 | 12.90627343 | 0.000327483 | 0.011355105 |
| ENSMUSG00000073725  | Lmbrd1    | 1.097141523 | 7.716785327 | 11.94358692 | 0.000548358 | 0.016674047 |
| ENSMUSG00000021665  | Hexb      | 1.14486092  | 6.151646185 | 11.68477682 | 0.000630135 | 0.018340108 |
| ENSMUSG00000025393  | Atp5b     | 1.076806322 | 9.828915744 | 11.00863116 | 0.000906886 | 0.02431064  |
| ENSMUSG00000000594  | Gm2a      | 1.120706565 | 6.220101697 | 10.57062914 | 0.001148986 | 0.028936309 |
| ENSMUSG00000026878  | Rab14     | 1.11520882  | 8.120076588 | 10.53509277 | 0.00117129  | 0.029317405 |
| ENSMUSG00000079477  | Rab7      | 1.099417306 | 8.188069594 | 10.23078462 | 0.001381159 | 0.033044229 |
| ENSMUSG000000061119 | Prcp      | 1.227041959 | 3.539198751 | 9.629539267 | 0.001914726 | 0.041410014 |
| ENSMUSG00000019850  | Tnfaip3   | 1.244037558 | 2.763438125 | 9.35588207  | 0.00222271  | 0.045892841 |
| ENSMUSG00000034708  | Grn       | 0.015229069 | 4.633446828 | 2662.524723 | 0           | 0           |
| ENSMUSG00000040701  | Ap1g2     | 0.696787362 | 1.735112606 | 13.58980604 | 0.000227417 | 0.008585333 |
| ENSMUSG00000025241  | Fyco1     | 0.874425599 | 5.537165699 | 13.20994262 | 0.000278468 | 0.009962384 |
| ENSMUSG00000004626  | Stxbp2    | 0.863178834 | 4.490285269 | 10.34068218 | 0.001301299 | 0.03172543  |
| ENSMUSG00000026426  | Arl8a     | 0.90576296  | 7.69079045  | 10.03241518 | 0.001538092 | 0.035773239 |

(Red) Up-regulated genes; (Blue) Down-regulated genes



**Table S2. Lysosomal DE genes (WT vs. *Grn*<sup>-/-</sup>) identified by LFQ-LCMS (Related to Figure 1)**

| Accession   | Description                                                              | FC (KO/WT)  | Minus log anova | Anova (p)   |
|-------------|--------------------------------------------------------------------------|-------------|-----------------|-------------|
| SCRB2_MOUSE | Lysosome membrane protein 2 OS=Mus musculus GN=Scarb2 PE=1 SV=3          | 1.717460849 | 3.599625908     | 0.000251405 |
| HEXB_MOUSE  | Beta-hexosaminidase subunit beta OS=Mus musculus GN=Hexb PE=2 SV=2       | 1.419799297 | 3.37642307      | 0.000420317 |
| PPGB_MOUSE  | Lysosomal protective protein OS=Mus musculus GN=Ctsa PE=1 SV=1           | 1.606164408 | 2.959928356     | 0.001096659 |
| TPP1_MOUSE  | Tripeptidyl-peptidase 1 OS=Mus musculus GN=Tpp1 PE=1 SV=2                | 1.537969104 | 2.756333981     | 0.001752532 |
| CATB_MOUSE  | Cathepsin B OS=Mus musculus GN=Ctsb PE=1 SV=2                            | 1.433319645 | 2.734587799     | 0.00184252  |
| LYAG_MOUSE  | Lysosomal alpha-glucosidase OS=Mus musculus GN=Gaa PE=1 SV=2             | 1.36516915  | 2.305368949     | 0.004950295 |
| CATL1_MOUSE | Cathepsin L1 OS=Mus musculus GN=Ctsl PE=1 SV=2                           | 1.879201231 | 2.225050107     | 0.005955934 |
| PAG15_MOUSE | Group XV phospholipase A2 OS=Mus musculus GN=Pla2g15 PE=1 SV=1           | 1.473324785 | 1.837822381     | 0.014527056 |
| STX7_MOUSE  | Syntaxin-7 OS=Mus musculus GN=Stx7 PE=1 SV=3                             | 1.376776076 | 1.752895215     | 0.01766464  |
| ANK3_MOUSE  | Ankyrin-3 OS=Mus musculus GN=Ank3 PE=1 SV=1                              | 1.139407233 | 1.467623802     | 0.034070319 |
| PLD3_MOUSE  | Phospholipase D3 OS=Mus musculus GN=Pld3 PE=2 SV=1                       | 1.258318747 | 1.464831411     | 0.034290087 |
| PLBL2_MOUSE | Putative phospholipase B-like 2 OS=Mus musculus GN=Plbd2 PE=1 SV=2       | 1.392080131 | 1.457473373     | 0.034875997 |
| ASSY_MOUSE  | Argininosuccinate synthase OS=Mus musculus GN=Ass1 PE=1 SV=1             | 1.246646865 | 1.415477407     | 0.038416924 |
| SAP3_MOUSE  | Ganglioside GM2 activator OS=Mus musculus GN=Gm2a PE=1 SV=2              | 2.410155811 | 1.413809738     | 0.038564727 |
| NAGAB_MOUSE | Alpha-N-acetylgalactosaminidase OS=Mus musculus GN=Naga PE=2 SV=2        | 1.275311603 | 1.407688581     | 0.039112126 |
| TM9S1_MOUSE | Transmembrane 9 superfamily member 1 OS=Mus musculus GN=Tm9sf1 PE=2 SV=2 | 1.249762294 | 1.405046227     | 0.039350819 |
| DPP2_MOUSE  | Dipeptidyl peptidase 2 OS=Mus musculus GN=Dpp7 PE=2 SV=2                 | 1.504111976 | 1.393936744     | 0.040370419 |
| FLOT2_MOUSE | Flotillin-2 OS=Mus musculus GN=Flot2 PE=1 SV=2                           | 0.855796512 | 2.101575183     | 0.007914524 |
| NOS1_MOUSE  | Nitric oxide synthase, brain OS=Mus musculus GN=Nos1 PE=1 SV=1           | 0.790561842 | 1.919909798     | 0.012025142 |

(Red) Up-regulated proteins; (Blue) Down-regulated proteins

**Table S3. Transcriptional changes of typical microglial inflammatory genes and markers in *Grn<sup>-/-</sup>* by RNASeq (Related to Figure 1)**

| Gene ID             | Gene name | Protein name | FC (KO/WT)  | logCPM       | LR          | PValue      | FDR         |
|---------------------|-----------|--------------|-------------|--------------|-------------|-------------|-------------|
| ENSMUSG00000020826  | Nos2      | iNOS         | 0.889401112 | -0.461154605 | 0.322524931 | 0.57009419  | 0.844485938 |
| ENSMUSG00000027398  | Il1b      | IL1 $\beta$  | 1.069998811 | -1.617255988 | 0.043552335 | 0.834688715 | 0.952695327 |
| ENSMUSG00000041736  | Tspo      | TSPO         | 0.977332782 | 1.404841348  | 0.044595355 | 0.832749842 | 0.951628872 |
|                     | Il6       | IL6          | n.d.        |              |             |             |             |
|                     | Tnf       | TNF $\alpha$ | n.d.        |              |             |             |             |
|                     | Cxcl2     | CXCL-2       | n.d.        |              |             |             |             |
|                     | Ccl2      | MCP-1        | n.d.        |              |             |             |             |
| ENSMUSG00000002603  | Tgfb1     | TGF $\beta$  | 0.999540027 | 2.747534118  | 4.12E-05    | 0.994881142 | 0.998166643 |
| ENSMUSG00000039239  | Tgfb2     | TGF $\beta$  | 1.113647335 | 4.203231776  | 3.792162081 | 0.051493094 | 0.306773286 |
| ENSMUSG000000021253 | Tgfb3     | TGF $\beta$  | 0.972487863 | 3.711871767  | 0.24785678  | 0.618588244 | 0.870700029 |
| ENSMUSG00000000869  | Il4       | IL4          | 0.897255216 | 2.748627265  | 2.273100556 | 0.131636313 | 0.474630815 |
| ENSMUSG00000050335  | Lgals3    | Galectin3    | 1.312583603 | -0.740947157 | 1.41660482  | 0.233963042 | 0.60292875  |
|                     | Retnla    | Fizz-1       | n.d.        |              |             |             |             |
|                     | Arg1      | ARG1         | n.d.        |              |             |             |             |
|                     | Il10      | IL-10        | n.d.        |              |             |             |             |
|                     | Chil3     | Ym1          | n.d.        |              |             |             |             |
| ENSMUSG00000024397  | Aif1      | Iba1         | 1.016499831 | 2.139374281  | 0.032621876 | 0.856669568 | 0.960032176 |
| ENSMUSG00000030786  | Irgam     | CD11b        | 0.955080319 | 4.575065915  | 0.948902327 | 0.329998858 | 0.69492553  |
| ENSMUSG00000026395  | Ptprc     | CD45         | 1.161138943 | 2.285824799  | 3.290563131 | 0.069679121 | 0.354844595 |
| ENSMUSG00000036353  | P2ry12    | P2ry12       | 0.975456495 | 5.601921255  | 0.284159349 | 0.593987902 | 0.85790284  |

(Red) Pro-inflammatory genes; (Blue) Anti-inflammatory genes; (Green) Microglial markers

Table S4. DE genes (WT vs. *Tmem106b*<sup>-/-</sup>) identified by RNASeq (Related to Figure 3)

| Gene ID             | Gene name | FC (KO/WT)  | LogCPM       | LR          | PValue      | FDR         |
|---------------------|-----------|-------------|--------------|-------------|-------------|-------------|
| ENSMUSG00000038801  | Scgb1c1   | 4.581810493 | -1.52946609  | 18.29516975 | 1.89E-05    | 0.010707942 |
| ENSMUSG00000016942  | Tmprss6   | 3.568384986 | -1.255765602 | 17.10879045 | 3.53E-05    | 0.016567934 |
| ENSMUSG00000027483  | Bpifa1    | 3.055213926 | -0.827585084 | 17.87488535 | 2.36E-05    | 0.012971223 |
| ENSMUSG00000033383  | Rtp1      | 2.232771461 | -0.369645817 | 14.64504494 | 0.000129775 | 0.046332256 |
| ENSMUSG00000004328  | Hif3a     | 1.994962989 | 2.363708467  | 58.43874113 | 2.10E-14    | 1.35E-10    |
| ENSMUSG000000025150 | Cbr2      | 1.785837301 | 0.724160762  | 15.3858561  | 8.76E-05    | 0.035884679 |
| ENSMUSG000000086189 | Gm15462   | 1.551721516 | 1.416433007  | 15.58471453 | 7.89E-05    | 0.033364413 |
| ENSMUSG000000037185 | Krt80     | 1.504850176 | 1.84541335   | 17.37255922 | 3.07E-05    | 0.015205292 |
| ENSMUSG000000024066 | Xdh       | 1.437973425 | 2.315546844  | 17.36686679 | 3.08E-05    | 0.015205292 |
| ENSMUSG00000004609  | Cd33      | 1.404999411 | 2.64768083   | 18.36974546 | 1.82E-05    | 0.010707942 |
| ENSMUSG00000015843  | Rxrg      | 1.372247112 | 4.221827603  | 21.98104177 | 2.75E-06    | 0.002649485 |
| ENSMUSG000000040010 | Slc7a5    | 1.257930526 | 5.777217944  | 29.38109145 | 5.95E-08    | 8.80E-05    |
| ENSMUSG000000020893 | Per1      | 1.236178503 | 6.154401537  | 32.45176651 | 1.22E-08    | 2.61E-05    |
| ENSMUSG000000042292 | Mkl1      | 1.206249447 | 5.905653763  | 17.55376362 | 2.79E-05    | 0.014526485 |
| ENSMUSG00000014361  | Mertk     | 1.196978085 | 5.472001039  | 17.62206461 | 2.69E-05    | 0.014403279 |
| ENSMUSG000000037887 | Dusp8     | 1.146431828 | 7.543969856  | 15.56414297 | 7.98E-05    | 0.033364413 |
| ENSMUSG000000062078 | Qk        | 0.879867084 | 8.737482279  | 15.01685255 | 0.000106555 | 0.04045806  |
| ENSMUSG000000027562 | Car2      | 0.858902855 | 7.292901745  | 18.2982     | 1.89E-05    | 0.010707942 |
| ENSMUSG000000033904 | Ccp110    | 0.853790625 | 6.360223017  | 16.09533731 | 6.02E-05    | 0.026955989 |
| ENSMUSG000000003746 | Man1a     | 0.852889053 | 5.410225435  | 14.64161831 | 0.000130012 | 0.046332256 |
| ENSMUSG000000020486 | Sept4     | 0.848146958 | 6.811317046  | 15.07147377 | 0.000103516 | 0.04045806  |
| ENSMUSG000000036634 | Mag       | 0.836626942 | 6.990191718  | 18.89727009 | 1.38E-05    | 0.008849029 |
| ENSMUSG000000041607 | Mbp       | 0.822629094 | 10.84551907  | 24.80384754 | 6.35E-07    | 0.000814286 |
| ENSMUSG000000031714 | Gab1      | 0.820943375 | 4.753729654  | 15.3020811  | 9.16E-05    | 0.036730191 |
| ENSMUSG000000039904 | Gpr37     | 0.814315882 | 5.701275775  | 24.35189298 | 8.02E-07    | 0.000908406 |
| ENSMUSG000000073680 | Tmem88b   | 0.812578601 | 5.140095229  | 16.2435576  | 5.57E-05    | 0.025520599 |
| ENSMUSG000000006782 | Cnp       | 0.807396291 | 8.051800683  | 41.5226997  | 1.17E-10    | 2.80E-07    |
| ENSMUSG000000056966 | Gjc3      | 0.80012246  | 5.603041151  | 31.51212602 | 1.98E-08    | 3.81E-05    |
| ENSMUSG000000076439 | Mog       | 0.785455191 | 5.54962515   | 27.46300168 | 1.60E-07    | 0.000220108 |
| ENSMUSG000000027858 | Tspan2    | 0.784581728 | 6.885040504  | 31.2027023  | 2.32E-08    | 4.07E-05    |
| ENSMUSG000000032517 | Mobp      | 0.782059642 | 9.256554333  | 30.00550681 | 4.31E-08    | 6.91E-05    |
| ENSMUSG000000031425 | Plp1      | 0.774278047 | 10.37637202  | 56.40102634 | 5.91E-14    | 2.84E-10    |
| ENSMUSG000000033579 | Fa2h      | 0.770551359 | 4.930733883  | 20.19010732 | 7.01E-06    | 0.005622022 |
| ENSMUSG000000020774 | Aspa      | 0.77002112  | 3.869636142  | 21.30867383 | 3.91E-06    | 0.003419821 |
| ENSMUSG000000037625 | Cldn11    | 0.744323456 | 7.009526095  | 42.47986011 | 7.14E-11    | 1.96E-07    |
| ENSMUSG000000033949 | Trim36    | 0.734179748 | 2.815875169  | 15.00510018 | 0.000107221 | 0.04045806  |
| ENSMUSG000000027375 | Mal       | 0.72805254  | 7.410384462  | 45.16136418 | 1.81E-11    | 5.82E-08    |
| ENSMUSG000000038173 | Enpp6     | 0.720007476 | 2.375812709  | 15.65608714 | 7.60E-05    | 0.033225496 |
| ENSMUSG000000036777 | Anln      | 0.718032618 | 4.699217449  | 17.30808836 | 3.18E-05    | 0.015290856 |
| ENSMUSG000000049892 | Rasd1     | 0.711012541 | 2.715777023  | 14.68203156 | 0.000127254 | 0.046332256 |
| ENSMUSG000000026830 | Ernm      | 0.710748342 | 5.534621557  | 50.95604881 | 9.45E-13    | 3.64E-09    |
| ENSMUSG000000034317 | Trim59    | 0.707069571 | 4.130795602  | 24.58408526 | 7.11E-07    | 0.000855598 |
| ENSMUSG000000032854 | Ugt8a     | 0.698284041 | 5.690440856  | 70.14992318 | 5.50E-17    | 5.29E-13    |
| ENSMUSG00000019232  | Etnppl    | 0.674475679 | 3.955651969  | 19.71637898 | 8.98E-06    | 0.006648666 |
| ENSMUSG000000021948 | Prkcd     | 0.640770853 | 3.794817581  | 20.08940079 | 7.39E-06    | 0.005688921 |
| ENSMUSG000000066652 | Lefty2    | 0.407885519 | -0.239512955 | 19.26079495 | 1.14E-05    | 0.008126943 |
| ENSMUSG000000079466 | Prdm12    | 0.325496566 | -0.76301034  | 18.31148304 | 1.88E-05    | 0.010707942 |
| ENSMUSG000000023964 | Calcr     | 0.289863522 | -0.601142145 | 22.64546193 | 1.95E-06    | 0.002015109 |
| ENSMUSG000000029571 | Tmem106b  | 0.261051544 | 7.078459598  | 1200.385629 | 5.03E-263   | 9.68E-259   |
| ENSMUSG000000037727 | Avp       | 0.157005208 | 2.055751823  | 21.71021918 | 3.17E-06    | 0.002905822 |
| ENSMUSG000000094065 | Gm21541   | 0.134757655 | -0.159400539 | 18.99574136 | 1.31E-05    | 0.008693678 |
| ENSMUSG000000027301 | Oxt       | 0.128250892 | 0.867644729  | 22.60509903 | 1.99E-06    | 0.002015109 |
| ENSMUSG000000073878 | Gm13304   | 0.126741531 | -0.29528205  | 19.00863381 | 1.30E-05    | 0.008693678 |
| ENSMUSG000000021342 | Prl       | 0.070698744 | -0.757273767 | 20.75768052 | 5.21E-06    | 0.004361035 |

(Red) Up-regulated genes; (Blue) Down-regulated genes

**Table S5. Transcriptional changes of typical microglial inflammatory genes and markers and TNG in *Tmem106b*<sup>-/-</sup> by RNASeq (Related to Figure 3)**

| Gene ID             | Gene name | FC (KO/WT)  | LogCPM       | LR          | PValue      | FDR         |
|---------------------|-----------|-------------|--------------|-------------|-------------|-------------|
| ENSMUSG00000020826  | Nos2      | 0.863620046 | -0.43152845  | 0.486932825 | 0.4852987   | 0.901756677 |
| ENSMUSG00000027398  | Il1b      | 0.939569499 | -1.675767135 | 0.034809371 | 0.851995675 | 0.983559521 |
| ENSMUSG00000041736  | Tspo      | 1.112652982 | 1.493664249  | 0.939838696 | 0.332319328 | 0.849184494 |
|                     | Il6       | n.d.        |              |             |             |             |
|                     | tnf       | n.d.        |              |             |             |             |
|                     | cxcl2     | n.d.        |              |             |             |             |
|                     | ccl2      | n.d.        |              |             |             |             |
| ENSMUSG00000039239  | Tgfb2     | 0.896992913 | 4.055378928  | 1.431572569 | 0.231507966 | 0.803611265 |
| ENSMUSG00000021253  | Tgfb3     | 0.969478596 | 3.707855494  | 0.257772458 | 0.611654653 | 0.935897843 |
| ENSMUSG00000002603  | Tgfb1     | 0.981204603 | 2.734025814  | 0.063906622 | 0.80042463  | 0.975262314 |
| ENSMUSG00000000869  | Il4       | 1.085303634 | 2.881495158  | 1.140144812 | 0.28562173  | 0.830601733 |
| ENSMUSG000000050335 | Lgals3    | 1.191810641 | -0.806256756 | 0.554736978 | 0.456388601 | 0.896281242 |
|                     | retnla    | n.d.        |              |             |             |             |
|                     | arg1      | n.d.        |              |             |             |             |
|                     | Il10      | n.d.        |              |             |             |             |
|                     | chil3     | n.d.        |              |             |             |             |
| ENSMUSG00000024397  | Aif1      | 1.017419805 | 2.144017108  | 0.034615558 | 0.852403538 | 0.983673941 |
| ENSMUSG00000030786  | Iltgam    | 1.052216821 | 4.646835502  | 0.912525878 | 0.339445116 | 0.851122527 |
| ENSMUSG00000026395  | Ptpcr     | 1.051716022 | 2.210878754  | 0.334546252 | 0.562994274 | 0.923703784 |
| ENSMUSG00000036353  | P2ry12    | 0.992892233 | 5.616997279  | 0.021034877 | 0.884683984 | 0.98559328  |
| ENSMUSG00000030579  | Tyrobp    | 1.15538277  | 3.203228563  | 4.615380091 | 0.031686472 | 0.556469087 |
| ENSMUSG00000023992  | Trem2     | 1.18277939  | 3.421411877  | 5.632426    | 0.017631214 | 0.481238276 |
| ENSMUSG00000018774  | Cd68      | 1.21665417  | 2.968832656  | 6.970305085 | 0.008287337 | 0.35389059  |
| ENSMUSG00000024672  | Ms4a7     | 1.585950844 | -0.558311216 | 4.52958319  | 0.033313731 | 0.564018739 |
| ENSMUSG00000004730  | Emr1      | 1.079450178 | 2.724934584  | 1.027034658 | 0.31085616  | 0.841130982 |
| ENSMUSG00000036887  | C1qa      | 1.194275767 | 5.366414516  | 7.969836166 | 0.004756324 | 0.295513111 |
| ENSMUSG00000036905  | C1qb      | 1.231966604 | 5.318484745  | 13.76648633 | 0.000206996 | 0.064248927 |
| ENSMUSG000000069516 | Lyz2      | 1.248362645 | 3.247704824  | 5.552452942 | 0.018454807 | 0.486543254 |
| ENSMUSG00000038642  | Ctss      | 1.022018806 | 5.644075364  | 0.268108328 | 0.604603554 | 0.934237256 |
| ENSMUSG00000016256  | Ctsz      | 1.116858995 | 4.829002523  | 3.745000474 | 0.052965712 | 0.615554375 |
| ENSMUSG00000006519  | Cyba      | 1.104979273 | 2.104215244  | 1.197469065 | 0.273828118 | 0.825254483 |
| ENSMUSG00000016534  | Lamp2     | 0.956335888 | 6.312532399  | 1.163414819 | 0.280758461 | 0.828076273 |
| ENSMUSG00000073418  | C4b       | 1.127717557 | 4.065320385  | 4.784308273 | 0.028720181 | 0.538340496 |
| ENSMUSG00000020120  | Plek      | 1.031625948 | 4.09203326   | 0.29980923  | 0.584002041 | 0.929776844 |
| ENSMUSG00000025351  | Cd63      | 1.016212858 | 5.196610041  | 0.123149104 | 0.725643815 | 0.962892201 |
| ENSMUSG00000024300  | Myo1f     | 1.175715534 | 1.596898951  | 2.360965614 | 0.124405163 | 0.730084855 |
| ENSMUSG00000030577  | Cd22      | 0.872899268 | -1.21367473  | 0.237994729 | 0.625658193 | 0.939965362 |
|                     | ccl8      | n.d.        |              |             |             |             |

(Red) Pro-inflammatory genes; (Blue) Anti-inflammatory genes; (Green) Microglial markers; (Purple) TNG
